# Supplementary material for: Screen detection of ductal carcinoma in situ and subsequent incidence of invasive interval breast cancers: a retrospective population-based study
Source: PubMed Central journal article supplement (PMC4691349; doi:10.1016/s1470-2045(15)00446-5), 2016-01
Supplement: mmc1.pdf [file mmc1.pdf]

# THE LANCET **Oncology**

## **Supplementary appendix**

This appendix formed part of the original submission and has been peer reviewed. We post it as supplied by the authors.

Supplement to: Duffy SW, Dibden A, Michalopoulos D, et al. Screen detection of ductal carcinoma in situ and subsequent incidence of invasive interval breast cancers: a retrospective population-based study. *Lancet Oncol* 2015; published online Dec 4. [http://dx.doi.org/10.1016/S1470-2045\(15\)00446-5](http://dx.doi.org/10.1016/S1470-2045(15)00446-5).

## Supplementary Material

**Table 1: Number of women screened by screening unit and year**

| Screening Unit | Total number of women screened by screening year |         |                       |         |
|----------------|--------------------------------------------------|---------|-----------------------|---------|
|                | 2003/04                                          | 2004/05 | 2005/06               | 2006/07 |
| AGA            | 19263                                            | 22808   | 18953                 | 21674   |
| ANE            | 19147                                            | 21282   | 22810                 | 22452   |
| ANT            | 18025                                            | 24449   | 25088                 | 22373   |
| AWC            | 8385                                             | 9879    | 9292                  | 9029    |
| BHL            | 23271                                            | 20909   | 19515                 | 16479   |
| BHU            | 22582                                            | 26199   | 27036                 | 24665   |
| BLE            | 22634                                            | 19627   | 23598                 | 19741   |
| BYO            | 18621                                            | 20035   | 21575                 | 21870   |
| CBA            | 6331                                             | 5331    | 6956                  | 6115    |
| CDN            | 9894                                             | 9136    | 10477                 | 10232   |
| CDO            | 10154                                            | 14987   | 8270                  | 10388   |
| CDS            | 15955                                            | 14486   | 16394                 | 15620   |
| CLE            | 22908                                            | 23666   | 25345                 | 25615   |
| CLI            | 16760                                            | 17342   | 15624                 | 15030   |
| CNN            | 5670                                             | 6615    | 6105                  | 6285    |
| CNO            | 16366                                            | 15519   | 20434                 | 18747   |
| CRO            | 6505                                             | 7008    | 6657                  | 7161    |
| CSH            | 12493                                            | 10459   | 11415                 | 12365   |
| DCB            | 13521                                            | 10402   | 9173                  | 14899   |
| DGY            | 6878                                             | 4815    | 7999                  | 7228    |
| DKL            | 6650                                             | 4609    | 6543                  | 6371    |
| DNF            | 13271                                            | 14223   | 18303                 | 14248   |
| DPT            | 8405                                             | 6959    | 9862                  | 8080    |
| DSU            | 9991                                             | 11193   | 8577                  | 9681    |
| DSW            | 6918                                             | 7431    | 9498                  | 5225    |
| EBA            | 29135                                            | 28851   | 30250                 | 23342   |
| ECX            | 21161                                            | 21997   | 25979                 | 26300   |
| ELD            | 30351                                            | 28916   | 30714                 | 33249   |
| FBH            | 11391                                            | 9745    | 13352                 | 17903   |
| FCO            | 16525                                            | 17571   | 20202                 | 18255   |
| FEP            | 11529                                            | 6775    | Excluded <sup>b</sup> | 6931    |
| FLO            | 16331                                            | 15051   | 16758                 | 15868   |
| FSO            | 15590                                            | 15317   | 15760                 | 15212   |
| GBR            | 20064                                            | 19807   | 19252                 | 17620   |
| GCA            | 27742                                            | 26743   | 28215                 | 29755   |
| GCT1           | 15181                                            | 16545   | 10174                 | 17069   |
| GCT2           | 10317                                            | 10991   | 17374                 | 11979   |
| GCT3           | 13411                                            | 13027   | 13650                 | 16357   |
| HGU            | 29029                                            | 29953   | 31478                 | 31424   |
| HWA            | 23520                                            | 25468   | 23822                 | 28464   |
| HWO            | 16496                                            | 19431   | 21952                 | 19508   |

|     |                  |       |       |       |
|-----|------------------|-------|-------|-------|
| JBA | 10762            | 12758 | 13403 | 11947 |
| JDO | 20292            | 18383 | 19305 | 20746 |
| JIW | 3835             | 3979  | 5374  | 4149  |
| JPO | 14665            | 10116 | 12522 | 16376 |
| JSO | 14333            | 15726 | 14497 | 16109 |
| JSW | 13031            | 13385 | 13003 | 14022 |
| KHW | 15709            | 15265 | 13140 | 13523 |
| KKE | 7931             | 8866  | 9591  | 8038  |
| KMK | 5448             | 6254  | 6146  | 6822  |
| KNN | 10588            | 9390  | 9133  | 9829  |
| KOX | 16205            | 12153 | 14586 | 14123 |
| KRG | 10801            | 12698 | 11479 | 11670 |
| KWI | 10753            | 10007 | 11144 | 11045 |
| LAV | 21018            | 19706 | 24181 | 30978 |
| LCO | 13292            | 13156 | 12547 | 10676 |
| LED | 11925            | 10961 | 15975 | 15763 |
| LGL | 16738            | 14500 | 14909 | 17342 |
| LPL | 15480            | 14029 | 15064 | 14446 |
| LSO | 12443            | 14867 | 13282 | 13237 |
| LTB | N/A <sup>a</sup> | 7255  | 9751  | 6789  |
| MAS | 12479            | 16766 | 19337 | 18577 |
| MBS | 7298             | 8121  | 9416  | 7596  |
| MBW | 21955            | 22397 | 23411 | 22402 |
| MCO | 25584            | 25687 | 27415 | 25458 |
| MDU | 12296            | 13904 | 14389 | 11972 |
| MHW | 24693            | 22500 | 18776 | 22926 |
| MSH | 10484            | 13701 | 10375 | 14160 |
| MST | 10987            | 11139 | 13064 | 11786 |
| NCH | 4238             | 6166  | 4438  | 4671  |
| NCR | 8731             | 7022  | 8065  | 8887  |
| NI  | 38926            | 30146 | 32061 | 31584 |
| NLI | 16428            | 19398 | 19408 | 17057 |
| NMA | 11712            | 12547 | 11927 | 13152 |
| NWA | 15120            | 13466 | 12697 | 14402 |
| NWI | 10984            | 8589  | 8348  | 10411 |
| PBO | 15528            | 15355 | 16023 | 16950 |
| PLE | 11420            | 12641 | 12259 | 10599 |
| PLN | 18251            | 17475 | 17482 | 16127 |
| PMA | 25340            | 22283 | 20610 | 27180 |
| PWI | 15469            | 16998 | 15243 | 15341 |
| WNM | 16130            | 15852 | 20820 | 15686 |
| WSE | 35509            | 33521 | 40146 | 35912 |
| WSW | 15825            | 21559 | 20873 | 17086 |

<sup>a</sup>. LTB began screening in 2004/05

<sup>b</sup>. Screening suspended between November 2004 and January 2005 so data for this unit for screening year 2004/05 was excluded from the analysis
